# Supplementary material for: Is High Milk Intake Good for Children’s Health? A National Population-Based Observational Cohort Study
Source: MDPI journal article supplement (doi:10.3390/nu13103494), 2021-10-02
Supplement: s1 [file s1]

**Supplementary Table S1.** Drug classification codes 322 in NHIS database

|     |                                      |                                                                                                                                                                                                                                    |
|-----|--------------------------------------|------------------------------------------------------------------------------------------------------------------------------------------------------------------------------------------------------------------------------------|
| 322 | Ferric hydroxide polymaltose complex | as Fe III 0.1g(6.667mg/mL)<br>as Fe III 0.1g(10mg/mL)<br>as Fe III 0.1g(20mg/mL)<br>as Fe III 1.5g(50mg/mL)<br>as Fe III 2.25g(50mg/mL)<br>as Fe III 2.5g(50mg/mL)<br>as Fe III 3g(50mg/mL)<br>as Fe III 5g(50mg/mL)<br>as Fe 0.1g |
|     | Iron proteinsuccinylate              | as Fe 20mg<br>as Fe III 40mg(2.667mg/mL)                                                                                                                                                                                           |
|     | Polysaccharide iron complex          | as Fe 50mg<br>as Fe 0.15g<br>as Fe 0.1g(5mg/mL)                                                                                                                                                                                    |
|     | Sodium ferric gluconate complex      | as Fe III 62.5mg<br>as Fe III 62.5mg(6.25mg/mL)<br>as Fe III 62.5mg(7.8125mg/mL)                                                                                                                                                   |
|     | Folic acid                           | 0.35mg                                                                                                                                                                                                                             |
|     | Ferrous sulfate dried                | as Fe II 80mg                                                                                                                                                                                                                      |
|     | Carbonyl iron                        | 45mg                                                                                                                                                                                                                               |
|     | Iron acetyl transferrin              | as Fe 40mg<br>as Fe 40mg(4mg/mL)                                                                                                                                                                                                   |
|     | Ferritinic iron                      | 40mg(4mg/mL)                                                                                                                                                                                                                       |
|     | Calcium folinate                     | 0.3mg(37.5µg/mL)                                                                                                                                                                                                                   |
|     | Iron dextran                         | as iron 0.1g(50mg/mL)                                                                                                                                                                                                              |
|     | Iron hydroxide sucrose complex       | as Fe 0.1g(20mg/mL)<br>as Fe 0.2g(20mg/mL)                                                                                                                                                                                         |

Abbreviation: NHIS, National Health Insurance System.

**Supplementary Table S2.** The association between the milk consumption and overweight in children

| Milk Consumption (mL/d)      | N=377,592 <sup>a</sup> |                                    | RR (95% CI)                             |                                         |
|------------------------------|------------------------|------------------------------------|-----------------------------------------|-----------------------------------------|
|                              | Subjects, N            | Overweight <sup>b</sup> ,<br>N (%) | Unadjusted                              | Adjusted <sup>c</sup>                   |
| Low Milk Group <sup>d</sup>  | 124,236                | 28,927 (23.28)                     | <b>0.851</b><br><b>(0.842 to 0.860)</b> | <b>0.904</b><br><b>(0.892 to 0.916)</b> |
| Reference Group <sup>e</sup> | 226,964                | 60,700 (26.74)                     | Ref                                     | Ref                                     |
| High Milk Group <sup>f</sup> | 26,392                 | 7,931 (30.05)                      | <b>1.151</b><br><b>(1.133 to 1.170)</b> | <b>1.120</b><br><b>(1.010 to 1.056)</b> |

Abbreviation: RR, relative risk; CI, confidence interval; BMI, body mass index.

<sup>a</sup> Subjects who recorded BMI at least once among the 5<sup>th</sup> to 7<sup>th</sup> rounds of NHSPIC were included.

<sup>b</sup> Obesity was defined as BMI for age z score  $\geq 1.03$ , based on the BMI recorded at the last round among the 5<sup>th</sup> to 7<sup>th</sup> NHSPIC.

<sup>c</sup> Adjusted for sociodemographic characteristics (Table 1), and obesity at the 4<sup>th</sup> round of NHSPIC, as recorded in the database.

<sup>d</sup> The group of children who drink <200 mL milk per day.

<sup>e</sup> The group of children who drink 200–499 mL milk per day.

<sup>f</sup> The group of children who drink  $\geq 500$  mL milk per day.

Bold values indicate  $p < 0.05$
